# Supplementary material for: Upregulation of interleukin-19 in severe asthma: a potential saliva biomarker for asthma severity
Source: PubMed Central journal article supplement — ERJ Open Res. 2021 Jul 26;7(3):00984-2020. doi: 10.1183/23120541.00984-2020 (PMC8311130; doi:10.1183/23120541.00984-2020), 2021-07-26
Supplement: 00984-2020.SUPPLEMENT_TABLES.pdf [file 00984-2020.SUPPLEMENT_TABLES.pdf]

**Supplementary table S1.** Gene expression datasets used in this study.

| <b>Number</b> | <b>GEO accession</b> | <b>Platform</b> | <b>Tissue types</b> |
|---------------|----------------------|-----------------|---------------------|
| 1             | GSE147881            | GPL6104         | Bronchial biopsies  |
| 2             | GSE43696             | GPL6480         | Bronchial brushing  |
| 3             | GSE132006            | GPL19965        | PBMCs               |
| 4             | GSE137268            | GPL6104         | Sputum              |

**Supplementary Table S2.** Demographics of subjects in study GSE147881

|                             | <b>Healthy control (n=13)</b> | <b>Mild-moderate asthma (n=18)</b> | <b>Severe asthma (n=42)</b> | <b>p-value*</b> |
|-----------------------------|-------------------------------|------------------------------------|-----------------------------|-----------------|
| Age, mean (SD), years       | 45 (12)                       | 61 (15)                            | 57 (12)                     | 0.004           |
| Male                        | 7/13 (54%)                    | 3/18 (17%)                         | 18/42 (43%)                 | NS              |
| Former smoker               | 2/13 (15%)                    | 2/18 (11%)                         | 10/42 (24%)                 | NS              |
| Oral use of corticosteroids | 0                             | 0                                  | 7/42 (17%)                  | 0.057           |

\*NS: non-significant, p-values of less than 0.05 were considered as statistically significant.

**Supplementary table S3.** Demographics of subjects in study GSE43696

|                       | <b>Healthy control (n=20)</b> | <b>Mild-moderate* asthma (n=50)</b> | <b>Severe asthma* (n=38)</b> | <b>p-value**</b> |
|-----------------------|-------------------------------|-------------------------------------|------------------------------|------------------|
| Age, mean (SD), years | 33 (13)                       | 33 (11)                             | 44 (10)                      | 0.001            |
| Male gender (%)       | 9/20 (45)                     | 15/50 (30)                          | 10/38 (26.3)                 | NS               |

\*There was no difference in the use of inhaled corticosteroids [1, 2].

\*\*NS: non-significant, p-values of less than 0.05 were considered as statistically significant.

**Supplementary table S4.** Demographics of subjects in study GSE132006

|                            | <b>Healthy (n=5)</b> | <b>Allergic asthmatic (n=5)</b> | <b>p-value*</b> |
|----------------------------|----------------------|---------------------------------|-----------------|
| Age, median (range), years | 22 (21-31)           | 25 (22-46)                      | NS              |
| Male gender (%)            | 3/5 (60)             | 1/5 (25)                        | NS              |

\*NS: non-significant, p-values of less than 0.05 were considered as statistically significant.

**Supplementary table S5.** Demographics of subjects in study GSE137268

|                              | <b>Controlled asthma (n=33)</b> | <b>Uncontrolled asthma (n=58)</b> | <b>p-value*</b> |
|------------------------------|---------------------------------|-----------------------------------|-----------------|
| Age, mean (SD), years        | 56 (3)                          | 56 (3)                            | NS              |
| Male gender (%)              | 8/21 (38)                       | 12/21 (57)                        | NS              |
| Asthma inflammatory subtypes |                                 |                                   |                 |
| Eosinophilic                 | 4/21 (19)                       | 9/21 (43)                         | NS              |
| Neutrophilic                 | 4/21 (19)                       | 4/21 (19)                         |                 |
| Paucigranulocytic            | 10/21 (48)                      | 5/21 (24)                         |                 |
| Mixed granulocytic           | 3/21 (14)                       | 3/21 (14)                         |                 |

\*NS: non-significant, p-values of less than 0.05 were considered as statistically significant.

**Supplementary table S6.** Demographics of study participants

|                             | <b>Healthy control (n=6)</b> | <b>Mild-moderate asthma (n=12)</b> | <b>Severe asthma (n=18)</b> | <b>p-value*</b> |
|-----------------------------|------------------------------|------------------------------------|-----------------------------|-----------------|
| Age, median (range), years  | 39 (37-41)                   | 56 (52-62)                         | 51 (37-61)                  | NS              |
| Male                        | 3/6 (50%)                    | 5/12 (41%)                         | 7/18 (39%)                  | NS              |
| Atopic status               | 1/6 (17%)                    | 5/12 (42%)                         | 12/18 (68%)                 | NS              |
| Oral use of corticosteroids | 0                            | 0                                  | 15/18 (83%)                 | -               |

\*NS: non-significant, p-values of less than 0.05 were considered as statistically significant.
